# Supplementary material for: Groundwater vulnerability on small islands
Source: Springer Nature journal article supplement (doi:10.1038/nclimate3128), 2016-09-19
Supplement: 41558_2016_BFnclimate3128_MOESM270_ESM.pdf [file 41558_2016_BFnclimate3128_MOESM270_ESM.pdf]

**Supplementary information for “Groundwater vulnerability on small islands” by S. Holding, D.M. Allen, S. Foster, A. Hsieh, I. Larocque, J. Klassen, and S.C. Van Pelt**

**Table S1:** List of 43 small island developing states included in assessment.

| <b>Small Island Developing State</b> | <b>Representative Island</b> | <b>Small Island Developing State</b> | <b>Representative Island</b> |
|--------------------------------------|------------------------------|--------------------------------------|------------------------------|
| Anguilla                             | Anguilla                     | Nauru                                | Nauru                        |
| Antigua and Barbuda                  | Antigua                      | Netherlands Antilles                 | Curacao                      |
| Aruba                                | Aruba                        | New Caledonia                        | Grande Terre                 |
| Barbados                             | Barbados                     | Niue                                 | Niue                         |
| British Virgin Islands               | Tortola                      | Palau                                | Koror                        |
| Cape Verde                           | Santiago                     | Puerto Rico                          | Puerto Rico                  |
| Comoros                              | Njazidja                     | Saint Kitts and Nevis                | Saint Kitts                  |
| Cook Islands                         | Rarotonga                    | Saint Lucia                          | Saint Lucia                  |
| Northern Marianas                    | Saipan                       | Saint Vincent and the Grenadines     | Saint Vincent                |
| Dominica                             | Dominica                     | Samoa                                | Upolu                        |
| Federated State of Micronesia        | Pohnpei                      | Sao Tome and Principe                | Sao Tome                     |
| Fiji                                 | Viti Levu                    | Seychelles                           | Mahe                         |
| French Polynesia                     | Tahiti                       | Singapore                            | Singapore                    |
| Grenada                              | Grenada                      | Solomon Islands                      | Malaita                      |
| Guam                                 | Guam                         | The Bahamas                          | New Providence               |
| Jamaica                              | Jamaica                      | Timor-Leste                          | Timor-Leste                  |
| Kiribati                             | Tarawa                       | Tonga                                | Tongatapu                    |
| Maldives                             | Male                         | Trinidad and Tobago                  | Trinidad                     |
| Marshall Islands                     | Majuro                       | Tuvalu                               | Funafati                     |
| Mauritius                            | Mauritius                    | US Virgin Islands                    | Saint Croix                  |
| Montserrat                           | Montserrat                   | Vanuatu                              | Efate                        |

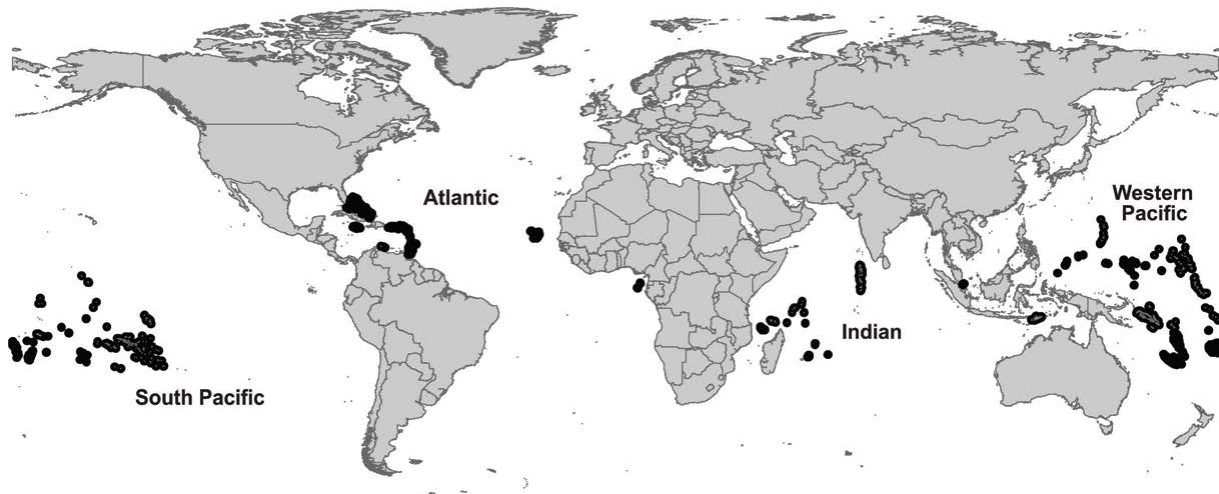

**Figure S1:** Map of 43 small island developing states included in assessment. The islands (shown in black) are enlarged for visibility; they are not to scale with the rest of the map.

**Table S2:** Ranges of aquifer hydraulic conductivity (K) values from Freeze and Cherry (Ref 20), Geometric Mean K from Gleeson et al. (Ref 21) and final K values used for recharge simulations where no K values are reported in the questionnaire.

| <b>Lithology</b>                               | <b>Freeze and Cherry<br/>K range<br/>(m/s)</b> | <b>Gleeson et al.<br/>Geomean K<br/>(m/s)</b> | <b>Values used<br/>(m/s)</b> |
|------------------------------------------------|------------------------------------------------|-----------------------------------------------|------------------------------|
| Undifferentiated<br>unfractured igneous        | $1 \times 10^{-14}$ to $1 \times 10^{-10}$     | $6 \times 10^{-5}$                            | $1 \times 10^{-12}$          |
| Undifferentiated<br>fractured igneous          | $5 \times 10^{-9}$ to $1 \times 10^{-4}$       | $6 \times 10^{-5}$                            | $1 \times 10^{-6}$           |
| Permeable volcanic                             | $1 \times 10^{-7}$ to $1 \times 10^{-2}$       | $3 \times 10^{-6}$                            | $3 \times 10^{-6}$           |
| Undifferentiated<br>unfractured<br>metamorphic | $1 \times 10^{-14}$ to $1 \times 10^{-10}$     | $6 \times 10^{-5}$                            | $1 \times 10^{-12}$          |
| Undifferentiated<br>fractured metamorphic      | $5 \times 10^{-9}$ to $1 \times 10^{-4}$       | $6 \times 10^{-5}$                            | $1 \times 10^{-6}$           |
| Coarse alluvium<br>(clean sand)                | $7 \times 10^{-6}$ to $1 \times 10^{-2}$       | $1 \times 10^{-6}$                            | $1 \times 10^{-4}$           |
| Carbonate                                      | $5 \times 10^{-10}$ to $2 \times 10^{-6}$      | $2 \times 10^{-5}$                            | $5 \times 10^{-8}$           |
| Karstic carbonate                              | $8 \times 10^{-7}$ to $1 \times 10^{-2}$       | $2 \times 10^{-5}$                            | $1 \times 10^{-4}$           |
| Shale                                          | $8 \times 10^{-14}$ to $8 \times 10^{-10}$     | $3 \times 10^{-10}$                           | $3 \times 10^{-10}$          |
| Sandstone                                      | $1 \times 10^{-10}$ to $1 \times 10^{-6}$      | $3 \times 10^{-6}$                            | $3 \times 10^{-6}$           |

**Table S3:** Summary of key attributes for each small island developing state and output from the climate change simulations and recharge modeling. K is hydraulic conductivity. ACI is aridity change index.

| SIDS                              | Area (km <sup>2</sup> ) | Population | K (m/s) | Historic Precip (mm/yr) | Future Precip (mm/yr) | Current Recharge (mm/yr) | Current AET (mm/yr) | 2060s Recharge (mm/yr) | 2060s AET (mm/yr) | Change in Recharge (%) | Change in AET (%) | ACI  | Recharge/Pop (m <sup>3</sup> /pers/yr) |
|-----------------------------------|-------------------------|------------|---------|-------------------------|-----------------------|--------------------------|---------------------|------------------------|-------------------|------------------------|-------------------|------|----------------------------------------|
| American Samoa                    | 145                     | 55876      | 1.4E-03 | 2857                    | 2642                  | 1379                     | 1478                | 1222                   | 1419              | -11%                   | -4%               | 1.04 | 3579                                   |
| Anguila                           | 71                      | 13452      | 4.3E-03 | 1547                    | 1495                  | 253                      | 1294                | 195                    | 1299              | -23%                   | 0%                | 1.04 | 1333                                   |
| Antigua and Barbuda               | 280                     | 80161      | 3.5E+01 | 2330                    | 2284                  | 790                      | 1532                | 673                    | 1572              | -15%                   | 3%                | 1.05 | 2759                                   |
| Aruba                             | 140                     | 103504     | 8.6E+01 | 779                     | 731                   | 105                      | 655                 | 130                    | 580               | 24%                    | -11%              | 0.94 | 142                                    |
| Barbados                          | 430                     | 277821     | 8.6E+00 | 2062                    | 1984                  | 606                      | 1432                | 516                    | 1455              | -15%                   | 2%                | 1.06 | 938                                    |
| Belau/ Palau                      | 8                       | 11560      | 8.6E-08 | 3261                    | 3243                  | 1562                     | 1699                | 1439                   | 1805              | -8%                    | 6%                | 1.07 | 1081                                   |
| British Virgin Islands            | 54                      | 23908      | 2.6E-01 | 2184                    | 2079                  | 578                      | 1563                | 445                    | 1592              | -23%                   | 2%                | 1.07 | 1306                                   |
| Cape Verde                        | 991                     | 240000     | 2.6E-01 | 285                     | 279                   | 60                       | 166                 | 56                     | 165               | -7%                    | -1%               | 1.02 | 248                                    |
| Comoros                           | 1148                    | 316600     | 5.9E+00 | 1677                    | 1709                  | 655                      | 1025                | 658                    | 1043              | 0%                     | 2%                | 1.00 | 2375                                   |
| Cook Islands                      | 67.1                    | 10572      | 8.6E-08 | 2194                    | 1704                  | 751                      | 1442                | 352                    | 1350              | -53%                   | -6%               | 1.21 | 4767                                   |
| C'wealth of the Northern Marianas | 120                     | 48220      | 8.8E+01 | 2079                    | 2243                  | 536                      | 1539                | 967                    | 1274              | 80%                    | -17%              | 0.77 | 1334                                   |
| Dominica                          | 751                     | 71293      | 2.6E-01 | 3493                    | 3445                  | 2027                     | 1399                | 1953                   | 1450              | -4%                    | 4%                | 1.05 | 21347                                  |
| Federated State of Micronesia     | 334.1                   | 36196      | 8.6E-08 | 3574                    | 3649                  | 1906                     | 1669                | 1906                   | 1743              | 0%                     | 4%                | 1.02 | 17593                                  |
| Fiji                              | 10429                   | 661997     | 1.0E+00 | 2619                    | 2054                  | 1302                     | 1277                | 888                    | 1134              | -32%                   | -11%              | 1.13 | 20519                                  |
| French Polynesia                  | 1043                    | 183645     | 8.6E-08 | 3574                    | 3649                  | 1918                     | 1656                | 1938                   | 1711              | 1%                     | 3%                | 1.01 | 10893                                  |
| Grenada                           | 344                     | 103328     | 8.6E-08 | 1516                    | 1413                  | 213                      | 1303                | 127                    | 1286              | -40%                   | -1%               | 1.06 | 710                                    |

| SIDS                           | Area (km <sup>2</sup> ) | Population | K (m/s) | Historic Precip (mm/yr) | Future Precip (mm/yr) | Current Recharge (mm/yr) | Current AET (mm/yr) | 2060s Recharge (mm/yr) | 2060s AET (mm/yr) | Change in Recharge (%) | Change in AET (%) | ACI  | Recharge/Pop (m <sup>3</sup> /pers/yr) |
|--------------------------------|-------------------------|------------|---------|-------------------------|-----------------------|--------------------------|---------------------|------------------------|-------------------|------------------------|-------------------|------|----------------------------------------|
| Guam                           | 561                     | 159358     | 7.3E+02 | 3445                    | 2239                  | 1209                     | 1615                | 726                    | 1125              | -40%                   | -30%              | 1.07 | 4256                                   |
| Jamaica                        | 10991                   | 2695543    | 1.7E+01 | 2007                    | 1910                  | 909                      | 1056                | 810                    | 1056              | -11%                   | 0%                | 1.05 | 3706                                   |
| Kiribati                       | 31                      | 40529      | 3.5E+01 | 929                     | 716                   | 167                      | 835                 | 170                    | 618               | 2%                     | -26%              | 0.96 | 128                                    |
| Maldives                       | 2                       | 105000     | 4.3E-03 | 2087                    | 2317                  | 573                      | 1514                | 697                    | 1620              | 22%                    | 7%                | 0.96 | 11                                     |
| Marshall Islands               | 10                      | 27797      | 6.0E+01 | 2550                    | 3310                  | 940                      | 1596                | 1695                   | 1615              | 80%                    | 1%                | 0.78 | 338                                    |
| Mauritius                      | 2040                    | 1236817    | 1.2E+02 | 2077                    | 2078                  | 969                      | 1102                | 950                    | 1123              | -2%                    | 2%                | 1.02 | 1598                                   |
| Montserrat                     | 103                     | 5164       | 8.6E-08 | 2587                    | 2525                  | 1061                     | 1413                | 938                    | 1457              | -12%                   | 3%                | 1.06 | 21152                                  |
| Nauru                          | 21.2                    | 10084      | 2.0E+03 | 2373                    | 3861                  | 1186                     | 1186                | 2571                   | 1290              | 117%                   | 9%                | 0.67 | 2493                                   |
| Netherlands Antilles           | 444                     | 150563     | 8.6E-02 | 553                     | 497                   | 6                        | 546                 | 4                      | 494               | -35%                   | -10%              | 1.01 | 18                                     |
| New Caledonia                  | 16372                   | 245580     | 5.5E+01 | 1519                    | 1203                  | 374                      | 1142                | 161                    | 1024              | -57%                   | -10%              | 1.13 | 24933                                  |
| Niue                           | 260                     | 1625       | 1.5E+03 | 2174                    | 1833                  | 900                      | 1492                | 504                    | 1453              | -44%                   | -3%               | 1.16 | 144000                                 |
| Puerto Rico                    | 8868                    | 3725789    | 8.6E-02 | 2065                    | 1968                  | 976                      | 1054                | 882                    | 1062              | -10%                   | 1%                | 1.06 | 2323                                   |
| Saint Kitts and Nevis          | 176                     | 35217      | 8.6E-08 | 2165                    | 2095                  | 766                      | 1346                | 673                    | 1368              | -12%                   | 2%                | 1.05 | 3828                                   |
| Saint Lucia                    | 617                     | 165770     | 2.6E-01 | 2276                    | 2198                  | 821                      | 1402                | 713                    | 1430              | -13%                   | 2%                | 1.06 | 3056                                   |
| Saint Vincent & the Grenadines | 344                     | 106253     | 8.6E-08 | 1581                    | 1503                  | 366                      | 1176                | 289                    | 1175              | -21%                   | 0%                | 1.05 | 1185                                   |
| Samoa                          | 1091                    | 143418     | 8.6E-08 | 2953                    | 2748                  | 1284                     | 1616                | 1337                   | 1360              | 4%                     | -16%              | 0.90 | 9770                                   |
| Sao Tome & Principe            | 854                     | 157500     | 2.6E-01 | 2097                    | 2132                  | 892                      | 1198                | 832                    | 1294              | -7%                    | 8%                | 1.06 | 4835                                   |
| Seychelles                     | 144                     | 78539      | 8.6E-02 | 1680                    | 1785                  | 539                      | 1140                | 599                    | 1186              | 11%                    | 4%                | 0.98 | 988                                    |
| Singapore                      | 714                     | 5399200    | 8.6E-05 | 2143                    | 2211                  | 608                      | 1528                | 611                    | 1594              | 0%                     | 4%                | 1.01 | 80                                     |

| SIDS              | Area (km <sup>2</sup> ) | Population | K (m/s) | Historic Precip (mm/yr) | Future Precip (mm/yr) | Current Recharge (mm/yr) | Current AET (mm/yr) | 2060s Recharge (mm/yr) | 2060s AET (mm/yr) | Change in Recharge (%) | Change in AET (%) | ACI  | Recharge/Pop (m <sup>3</sup> /pers/yr) |
|-------------------|-------------------------|------------|---------|-------------------------|-----------------------|--------------------------|---------------------|------------------------|-------------------|------------------------|-------------------|------|----------------------------------------|
| Solomon Islands   | 4307                    | 137596     | 4.3E-03 | 3100                    | 3554                  | 1606                     | 1439                | 2038                   | 1460              | 27%                    | 1%                | 0.88 | 50262                                  |
| The Bahamas       | 207                     | 248948     | 1.1E+02 | 1235                    | 1175                  | 184                      | 1051                | 155                    | 1020              | -16%                   | -3%               | 1.02 | 153                                    |
| Timor-Leste       | 14919                   | 1066582    | 8.6E-08 | 1470                    | 1956                  | 554                      | 914                 | 928                    | 1021              | 68%                    | 12%               | 0.84 | 7749                                   |
| Tonga             | 260.5                   | 75416      | 1.2E+02 | 1788                    | 1609                  | 533                      | 1362                | 403                    | 1355              | -24%                   | -1%               | 1.11 | 1841                                   |
| Trinidad & Tobago | 4800                    | 1267145    | 8.6E-08 | 1640                    | 1538                  | 398                      | 1243                | 285                    | 1253              | -28%                   | 1%                | 1.07 | 1508                                   |
| Tuvalu            | 2.4                     | 6194       | 1.0E-01 | 2929                    | 4051                  | 1292                     | 1636                | 2341                   | 1710              | 81%                    | 5%                | 0.76 | 501                                    |
| US Virgin Islands | 218                     | 50601      | 3.0E+02 | 2176                    | 2079                  | 1063                     | 1106                | 690                    | 1382              | -35%                   | 25%               | 1.31 | 4580                                   |
| Vanuatu           | 915                     | 65829      | 8.6E-08 | 2718                    | 1759                  | 1308                     | 1344                | 553                    | 1155              | -58%                   | -14%              | 1.33 | 18176                                  |

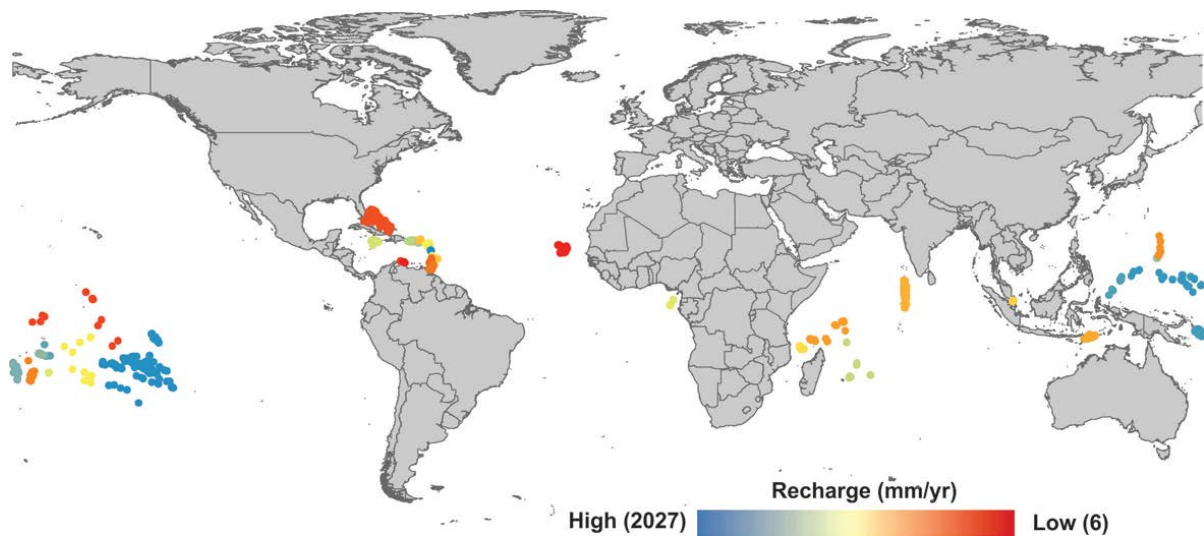

**Figure S2:** Estimated recharge rate (mm/yr). The recharge rates for each small island developing state are enlarged for visibility; they are not to scale with the rest of the map.
